# Supplementary material
Source: Springer Nature journal article supplement (https://www.springermedizin.de/resource/supplementary/12885_2014_4827_MOESM13_ESM.pdf/9467454)

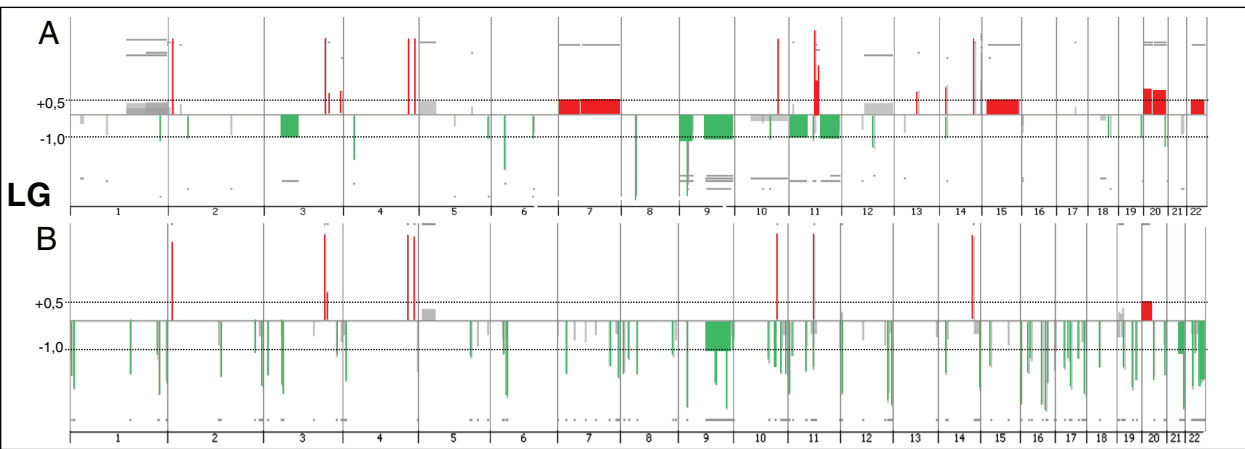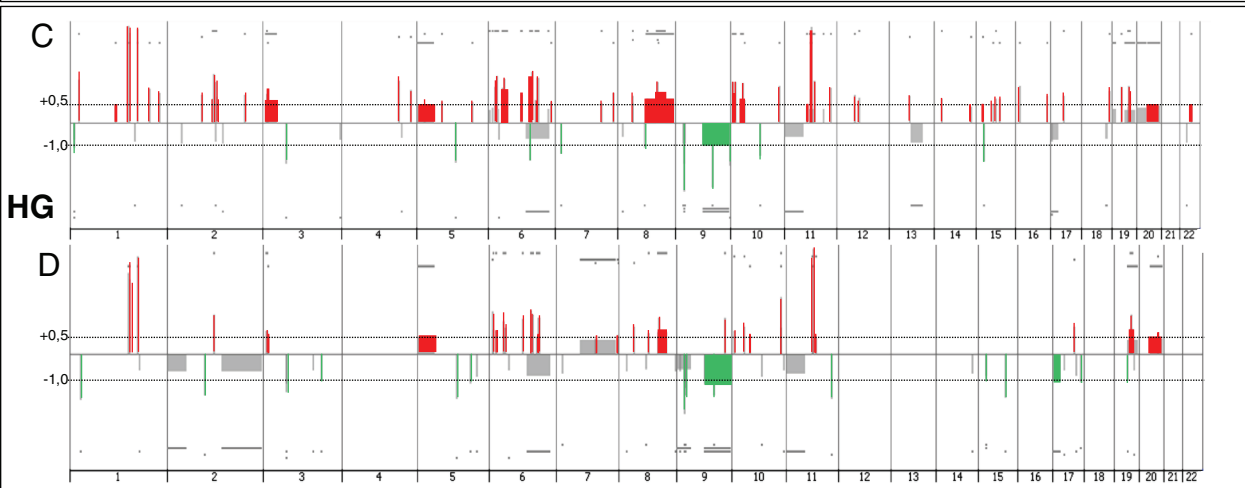

Supplement: MOESM13 [file 9467454]
